# Supplementary material
Source: PubMed Central journal article supplement (PMC5969384)
Supplement: blood835561-suppl1.pdf [file blood835561-suppl1.pdf]

## Supplemental Data

### **Patients with *CD3G* mutations reveal a role for human CD3 $\gamma$ in T<sub>reg</sub> diversity and suppressive function**

Jared H. Rowe, Ottavia M. Delmonte, Sevgi Keles, Brian D. Stadinski, Adam K. Dobbs, Lauren A. Henderson, Yasuhiro Yamazaki, Luis M. Allende, Francisco A Bonilla, Luis I. Gonzalez-Granado, Seyma Celikbilek Celik, Sukru N. Guner, Hasan Kapakli, Christina Yee, Sung-Yun Pai, Eric S. Huseby, Ismail Reisli, Jose R. Regueiro, and Luigi D. Notarangelo.

**Table S1 – Characteristics of autoimmunity in CD3G-mutated patients**

| Patient # | Autoimmune manifestation                                           | Age at onset                                | Treatment                                      | Age at the time of the study | Outcome                                                                                | Current age (years) |
|-----------|--------------------------------------------------------------------|---------------------------------------------|------------------------------------------------|------------------------------|----------------------------------------------------------------------------------------|---------------------|
| P1        | Enteropathy<br>AIHA<br>GLILD                                       | 15 months<br>21 months<br>21 months         | Rituximab,<br>sirolimus                        | 27 months                    | MUD-HSCT at 32 months,<br>deceased at 47 months<br>(GvHD, infections)                  | N/A                 |
| P2        | Subclinical hypothyroidism<br>(positive TG and TPO Ab)             | 11 years                                    | none                                           | 19 years                     | Actively followed,<br>no treatment needed                                              | 20                  |
| P3        | Hypothyroidism                                                     | 5 years                                     | Thyroid<br>hormone<br>replacement              | 6 years                      | Still under hormone<br>replacement therapy                                             | 7                   |
| P4        | Evans syndrome<br>Autoimmune hepatitis<br>Nephropathy<br>ALPS      | 12 months<br>5 years<br>5 years<br>12 years | Steroids,<br>cyclosporine A,<br>high dose IVIG | 15 years                     | Multiple relapses of Evans<br>syndrome, persistent<br>hepatomegaly and<br>splenomegaly | 18                  |
| P5        | Hypothyroidism                                                     | 10 years                                    | Thyroid<br>hormone<br>replacement              | 23 years                     | Still under hormone<br>replacement therapy                                             | 24                  |
| P6        | Vitiligo<br>Subclinical hypothyroidism<br>(positive TG and TPO Ab) | 12 months<br>18 years                       | none                                           | 34 years                     | Actively followed,<br>no treatment needed                                              | 36                  |

Ab, antibody; AIHA, autoimmune hemolytic anemia; ALPS, autoimmune lymphoproliferative syndrome; GLILD, granulomatous lymphocytic interstitial lung disease; GvHD, graft versus host disease; IVIG, intravenous immunoglobulins; MUD-HSCT, hematopoietic stem cell transplantation from a matched unrelated donor; TG, thyroglobulin; TPO, thyroid peroxidase

N/A: not applicable

**Figure S1 - High throughput sequencing analysis of TRB repertoire in CD4<sup>+</sup> T<sub>conv</sub>, CD4<sup>+</sup> T<sub>reg</sub>, and CD8<sup>+</sup> T cell subsets.** Heat maps showing Vβ and Jβ pairing in unique TRB reads of CD4<sup>+</sup> T<sub>conv</sub> (top), CD4<sup>+</sup> T<sub>reg</sub> (middle) or CD8<sup>+</sup> T cells (bottom) from all controls and all CD3G-mutated patients included in the study.

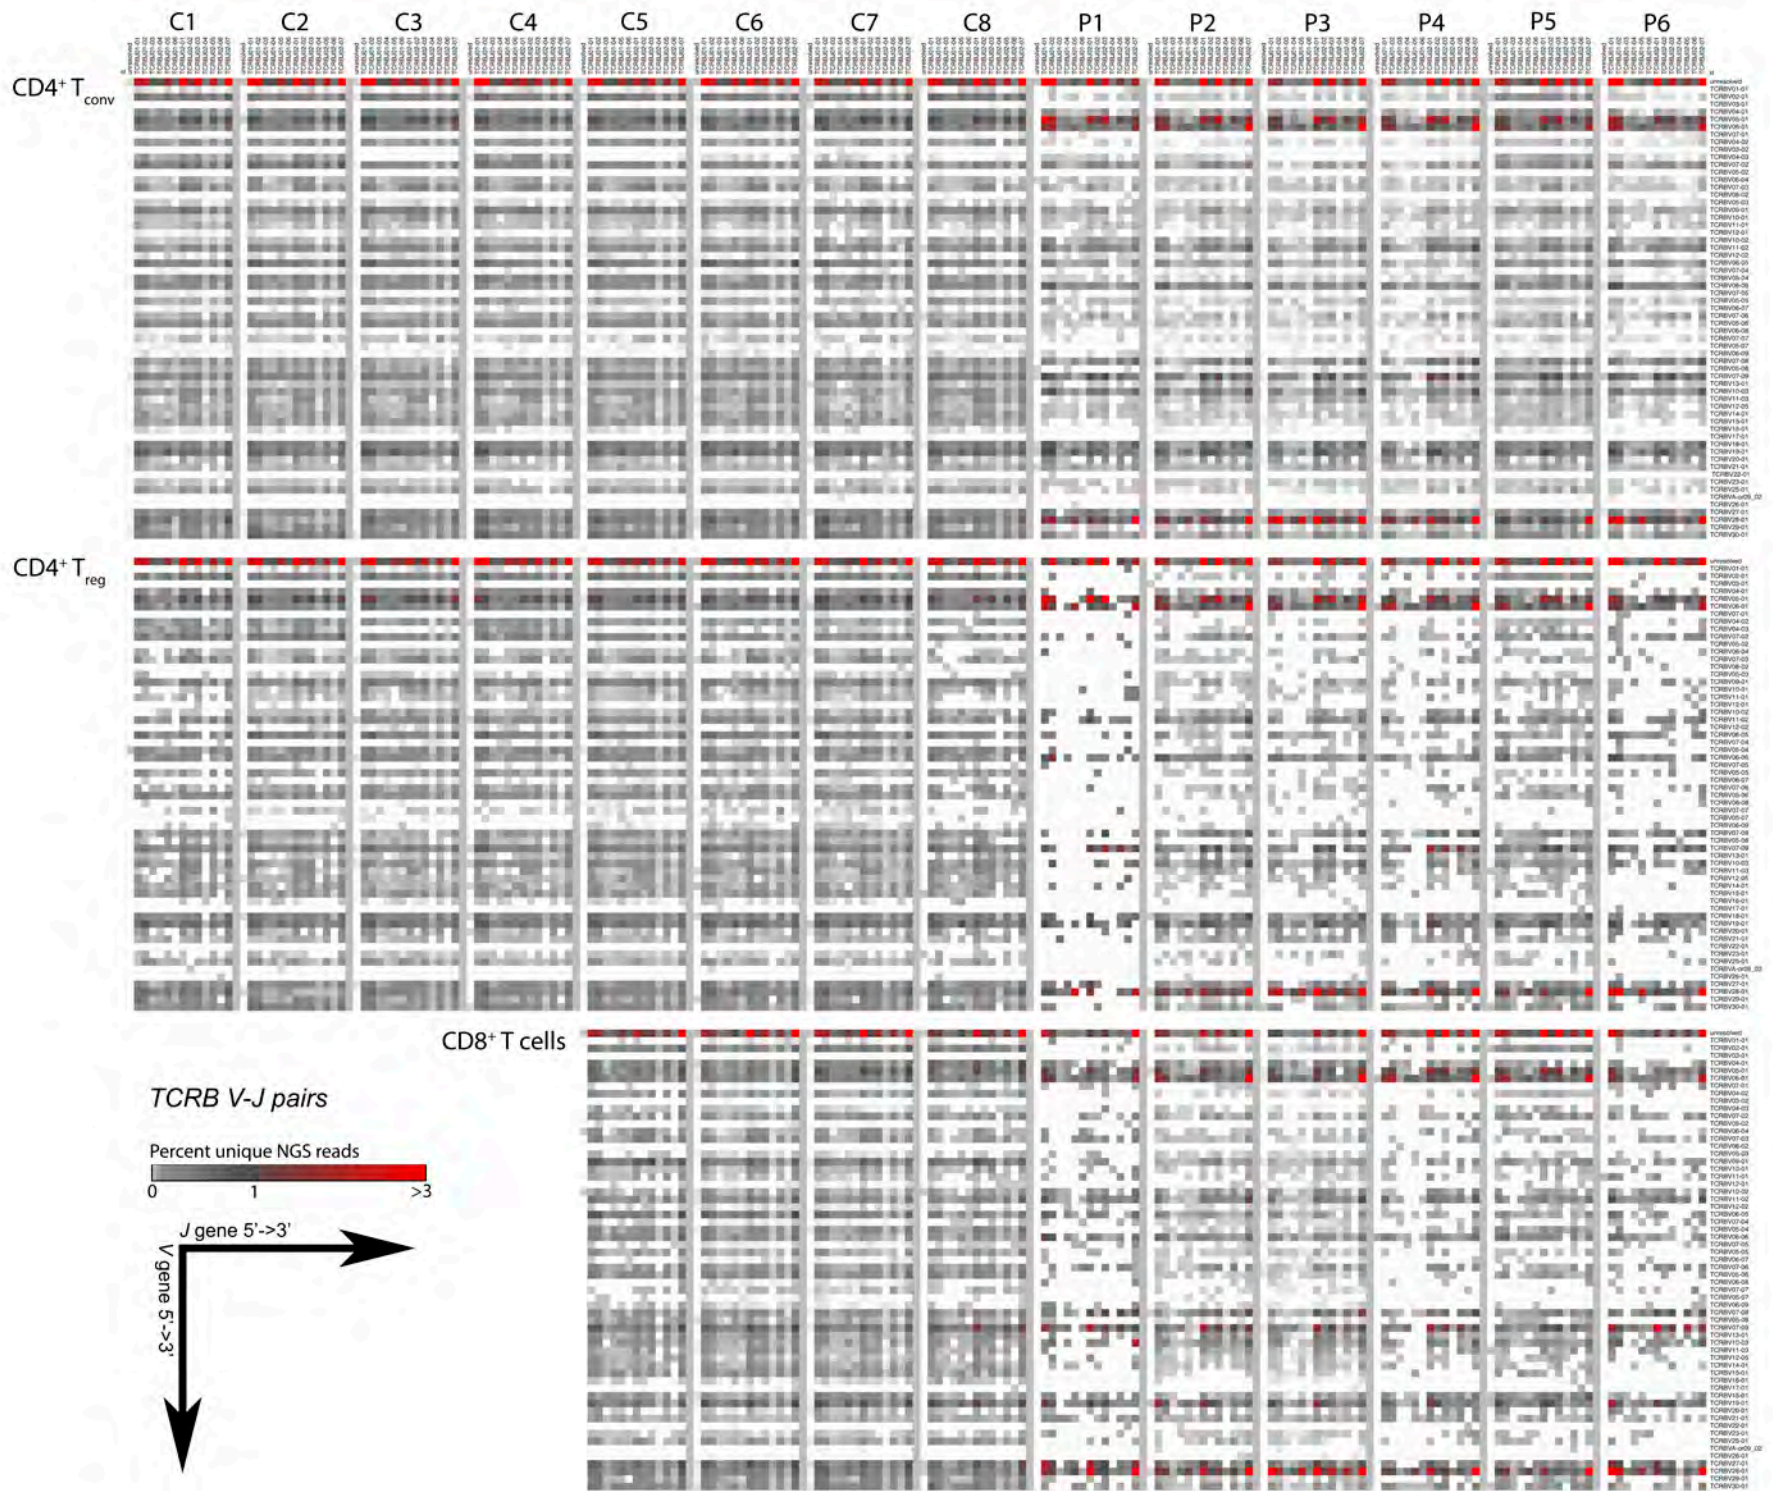

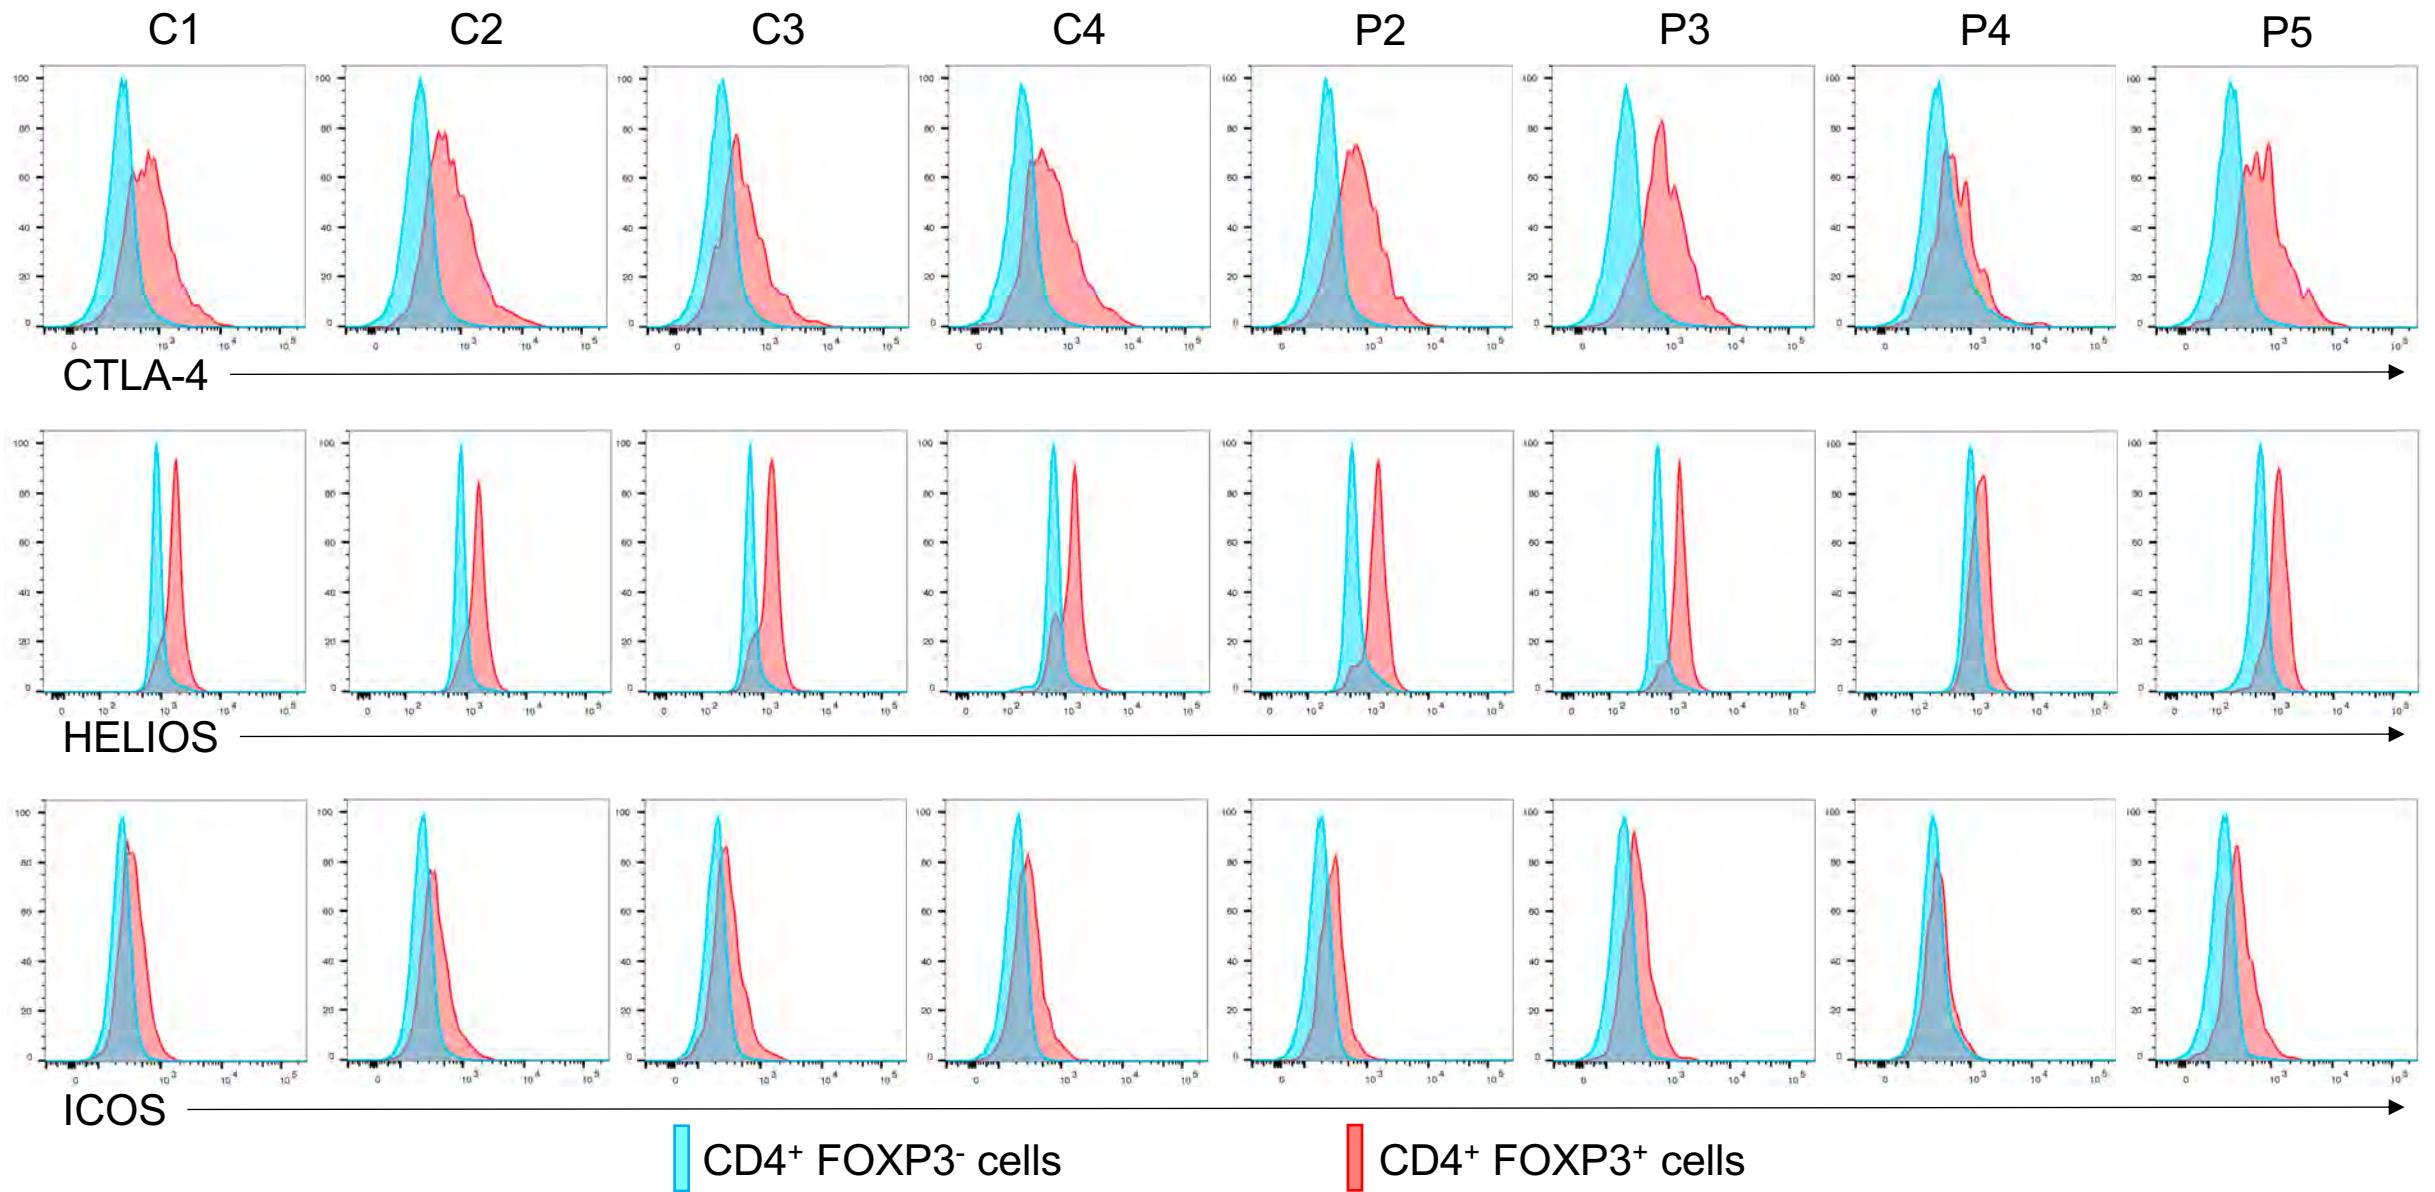

**Figure S2 – Overlay of expression of CTLA-4, HELIOS, and ICOS on CD4<sup>+</sup> FOXP3<sup>-</sup> T conventional (T<sub>conv</sub>) cells (blue) and CD4<sup>+</sup> FOXP3<sup>+</sup> regulatory T (T<sub>reg</sub>) cells (red) from controls (C1-C4) and patients (P2-P5). Results demonstrate that T<sub>reg</sub> cells from both controls and patients show increased expression of CTLA-4, HELIOS, and ICOS as compared to T<sub>conv</sub> cells.**
